# Supplementary material for: HSF1 and HSF3 cooperatively regulate the heat shock response in lizards
Source: PubMed Central journal article supplement (PMC5501597; doi:10.1371/journal.pone.0180776), 2017-07-07
Supplement: pone.0180776.s004.pdf [file pone.0180776.s004.pdf]

**S1 Table. Primer sequences used to amplify AsHSF and XtHSF cDNAs.**

|        | Forward Primer                                             | Reverse Primer                                     |
|--------|------------------------------------------------------------|----------------------------------------------------|
| AsHSF1 | 5'- <b>ATG</b> GAGCCCCGGCGTGG-3'                           | 5'- <b>CTA</b> CGAGACGCCCCCTCCGG-3'                |
| AsHSF2 | 5'- <b>ATG</b> AAGCAGCAGCCGGTTGC-3'                        | 5'- <b>TTA</b> GTATTTAACAATGGCATATCTGTGTCCAT-3'    |
| AsHSF3 | 5'- <b>ATG</b> GCGGGGCGATGGCCGCGGGC-3'                     | 5'-CATGTA <b>CTGAATCAGCTGCATGTCTG</b> -3' (3'-UTR) |
| AsHSF4 | 5'- <b>ATG</b> CAGGATTCCCCCCTTCG-3'                        | 5'- <b>TCA</b> TTTGCACTCTTCTCCCGATCC-3'            |
| XtHSF1 | 5'-GT <b>GAA</b> 7 <b>TCAT</b> GATCCACACGGGACCTGTGGG-3'    | 5'-GACTCGAG <b>CTA</b> GGAGATGCTGGAGCCCGCCGGCT-3'  |
| XtHSF2 | 5'-GT <b>GAA</b> 7 <b>TCAT</b> GAAACAGAACTCAAATGTTCCGGC-3' | 5'-GACTCGAG <b>TTA</b> TCCAGCAGCGGCATATCATTGTC-3'  |
| XtHSF3 | 5'-GT <b>GAA</b> 7 <b>TCAT</b> GAGGAGCCGTCTGTCCCTCTGGG-3'  | 5'-GTC <b>TCGAG</b> TTAAACTGTGTCTGGCTCTGTGGCTT-3'  |
| XtHSF4 | 5'-GTGG <b>TACCAT</b> GAGGAATCTGCCAGCTCCTTGGC-3'           | 5'-GACTCGAG <b>CACT</b> CGTTTTGCTCATCTGGCTGCT-3'   |

Red, translation start sites; Blue, translation termination sites.

Italics indicate EcoRI, KpnI or XhoI sites.
